# Supplementary material for: Short-Term Mortality in Hospitalized Patients with Congestive Heart Failure: Markers of Thrombo-Inflammation Are Independent Risk Factors and Only Weakly Associated with Renal Insufficiency and Co-Morbidity Burden
Source: MDPI journal article supplement (doi:10.3390/jcdd11030093), 2024-03-20
Supplement: s1 [file s1]

**Supplemental File S-1**

**Supplemental Fig. S-1) Receiver operating characteristics curve (ROC) for urea**

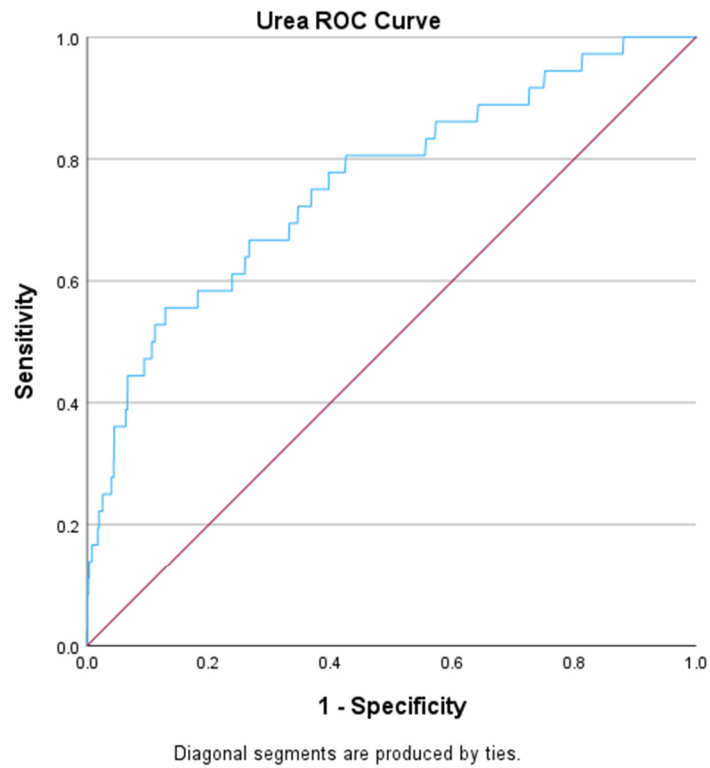

**Supplemental Fig. S-1) ROC curve for Urea demonstrating an area under the curve (AUC) of 0.76**

**Supplemental Fig. S-2) Receiver operating characteristics curve (ROC) for Thrombin Time**

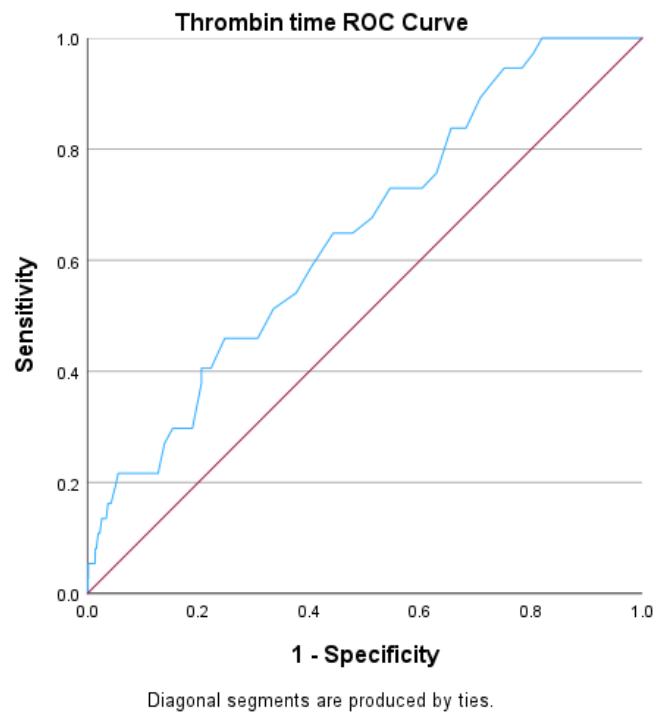

**Supplemental Fig. S-2) ROC curve for Thrombin time demonstrating an AUC of 0.647**

**Supplemental Fig. S-3) Receiver operating characteristics (ROC) curve for Creatinine**

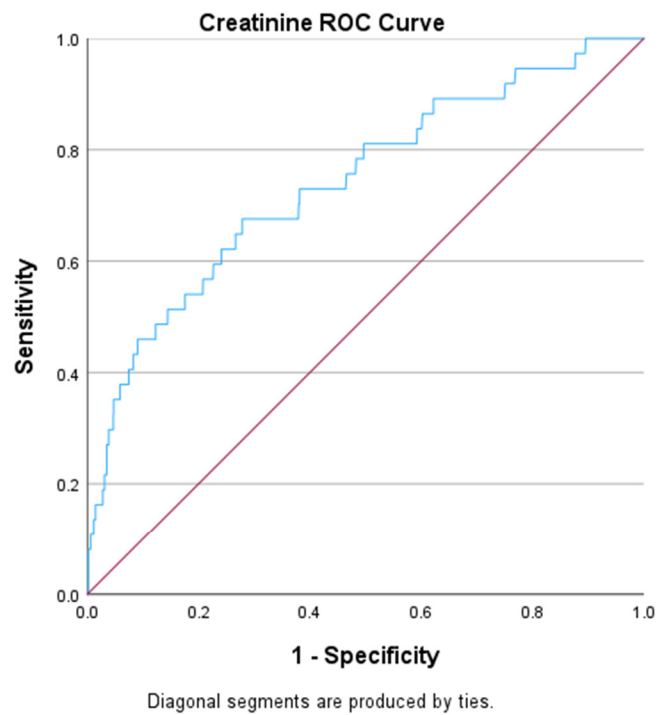

**Supplemental Fig. S-3) ROC curve for creatinine demonstrating an AUC of 0.74**

**Supplemental Fig. S-4) Receiver operating characteristic curve (ROC) for D-Dimer**

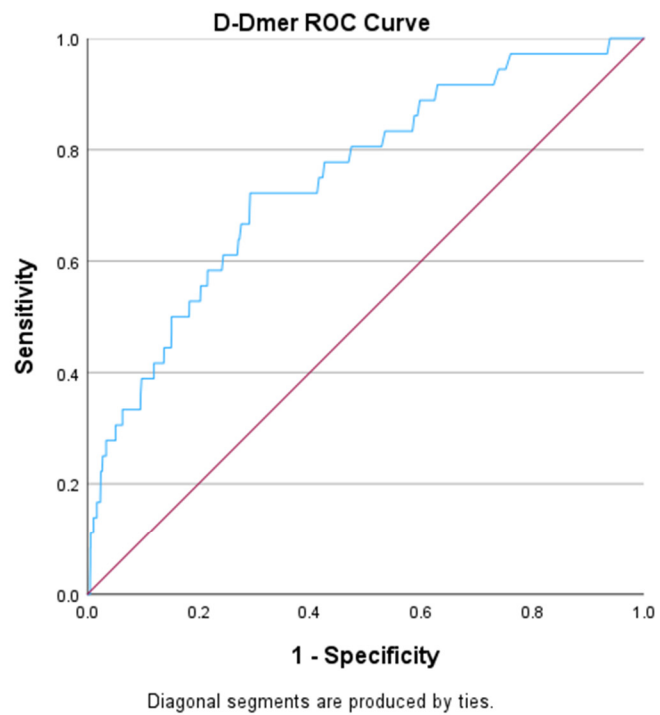

**Supplemental Fig. S-4) ROC curve for D-Dimer demonstrating an AUC 0.75**

**Supplemental Fig S-5) Receiver operating characteristic curve for PLR**

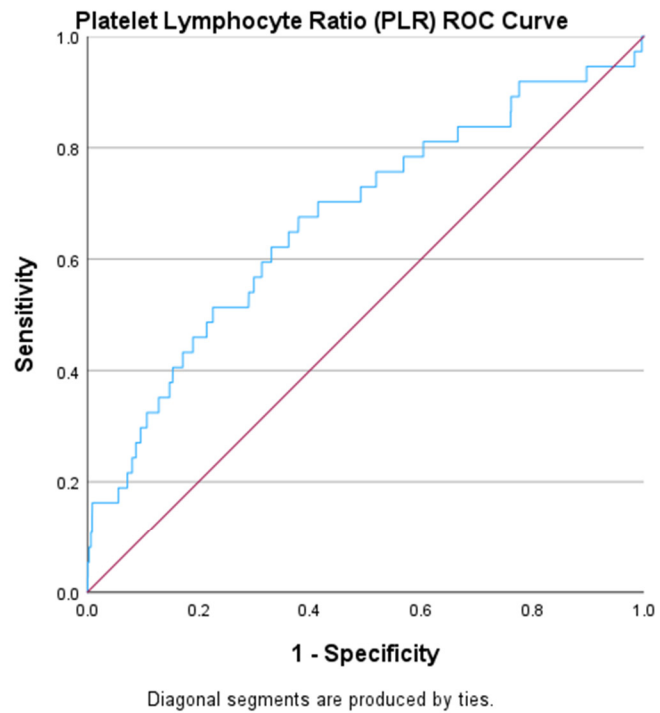

**Fig. S-5) ROC curve for PLR demonstrating an AUC 0.67**

**Supplemental Fig. S-6) Receiver operating characteristic curve for Age adjusted D-Dimer**

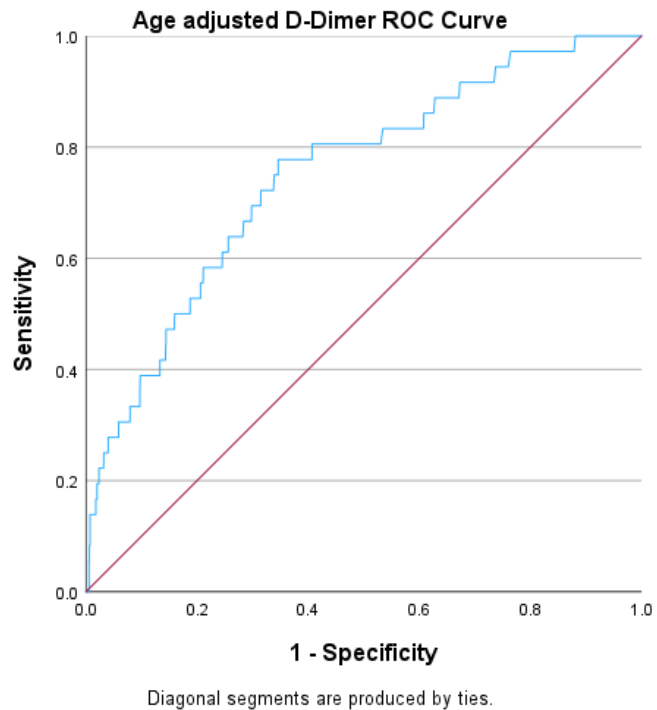

**Supplemental Fig. S-6) ROC curve for age adjusted D-Dimer demonstrating an AUC 0.75**

**Table S-1 . Missing values in our data set.**

|               | N    | Missing |         |
|---------------|------|---------|---------|
|               |      | Count   | Percent |
| D_dimer       | 1840 | 168     | 8.4     |
| Thrombin_time | 1974 | 34      | 1.7     |
| Fibrinogen    | 1974 | 34      | 1.7     |
| Troponin I    | 1929 | 79      | 3.9     |
| BNP           | 1973 | 35      | 1.7     |
| CRP           | 941  | 1067    | 53.1    |

|                  |      |     |     |
|------------------|------|-----|-----|
| Urea             | 1985 | 23  | 1.1 |
| Uric_acid        | 1985 | 23  | 1.1 |
| GFR              | 1945 | 63  | 3.1 |
| Cystatin-C       | 1967 | 41  | 2.0 |
| WBC              | 1981 | 27  | 1.3 |
| Lymphocyte       | 1981 | 27  | 1.3 |
| Hemoglobin       | 1980 | 28  | 1.4 |
| Platelet         | 1981 | 27  | 1.3 |
| Neutrophil_count | 1981 | 27  | 1.3 |
| Potassium        | 1997 | 11  | .5  |
| Sodium           | 1997 | 11  | .5  |
| Albumin          | 1906 | 102 | 5.1 |
| Total_bilirubin  | 1906 | 102 | 5.1 |
| Creatinine       | 1985 | 23  | 1.1 |
| NLR              | 1981 | 27  | 1.3 |
| PLR              | 1981 | 27  | 1.3 |

**NLR Neutrophil lymphocyte ratio**

**PLR Platelet lymphocyte ratio**
